# Supplementary material for: Lymphocyte Activation Dynamics Is Shaped by Hereditary Components at Chromosome Region 17q12-q21
Source: PubMed Central journal article supplement (PMC5106028; doi:10.1371/journal.pone.0166414), 2016-11-11
Supplement: pone.0166414.s001.pdf [file pone.0166414.s001.pdf]

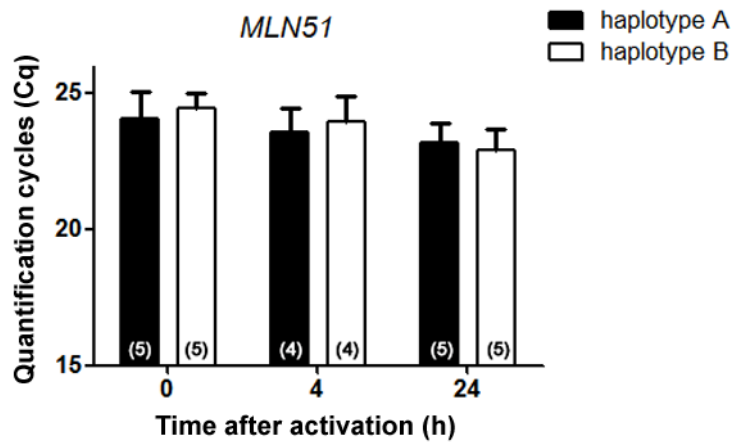

**S1 Figure. Expression levels of MLN51 under lymphocyte activation.** *MLN51* amplification expressed in quantification cycles (Cq) obtained by real time PCR reaction of cDNA generated from 100 ng RNA of CD3/CD28-activated T cells from different individuals at 0, 4 and 24 h time points after activation. The number of individuals of haplotype A and haplotype B carriers is indicated in brackets. Data presented as mean  $\pm$  SD.
